1 **Gut transcriptome reveals differential gene expression and enriched pathways**  
2 **linked to immune activation in response to weaning in pigs.**

3 M. Le Bon <sup>1,2\*</sup>, S. Töttemeyer <sup>3</sup>, R. D. Emes <sup>3,4</sup>, K. H. Mellits <sup>1</sup>

4

5 <sup>1</sup> *School of Biosciences, Division of Microbiology, Brewing and Biotechnology,*  
6 *University of Nottingham, Loughborough, LE12 5RD, UK.*

7 <sup>2</sup> *School of Animal, Rural and Environmental Sciences, Nottingham Trent University,*  
8 *Southwell, NG25 0QF, UK.*

9 <sup>3</sup> *School of Veterinary Medicine and Science, University of Nottingham. LE12 5RD,*  
10 *UK.*

11 <sup>4</sup> *Advanced Data Analysis Centre, University of Nottingham. LE12 5RD, UK*

12

13 \*Corresponding author: M. Le Bon. Email: [melaniesophie.lebon@gmail.com](mailto:melaniesophie.lebon@gmail.com)

14

15 **Abstract**

16 Weaning represents one of the most critical periods in pig production associated with  
17 increase in disease risk, reduction in performance and economic loss. Physiological  
18 changes faced by piglets during the weaning period have been well characterised,  
19 however little is currently known about the underlying molecular pathways involved in  
20 these processes. As pig meat remains one of the most consumed sources of protein  
21 worldwide, understanding how these changes are mediated is critical to improve pig  
22 production and consequently sustainable food production globally. In this study, we  
23 evaluated the effect of weaning on transcriptomic changes in the colon of healthy  
24 piglets over time using an RNA-sequencing approach.

25

26 The findings revealed a complex and coordinated response to weaning with the  
27 majority of genes found to be rapidly differentially expressed within one day post  
28 weaning. Multiple genes and pathways affected by weaning in the colon were  
29 associated with immune regulation, cell signalling and bacterial defence. NOD-like  
30 receptors, Toll-like receptor and JAK-STAT signalling pathways were amongst the  
31 pathways significantly enriched. Immune activation was evidenced by the enrichment  
32 of pathways involved in interferon response, cytokines interactions, oxidoreductase  
33 activities and response to microbial invasion. Biosynthesis of amino acids, in particular  
34 arginine, was also amongst the most enriched KEGG pathways in weaned pigs,  
35 reinforcing the critical role of arginine in gut homeostasis under stress conditions.

36

37 Overall, transcriptomic and physiological results suggest that pigs going through the  
38 weaning transition undergo a transient period of inflammatory state with a temporary  
39 breakdown of barrier functions in the gut. These findings could provide valuable tools  
40 to monitor host response post weaning, and may be of particular relevance for the  
41 investigation and development of intervention strategies aimed to reduce antibiotic use  
42 and improve pig health and performance.

43

44 **Keywords:** Pig, Weaning, RNA-sequencing, Transcriptomic, Gut, Immune response.

45

46

## 47 **Introduction**

48 Livestock production is expected to produce more food than ever before. As the  
49 expanding world population is getting wealthier, the demand for safe and secure  
50 animal protein is increasing (Henchion et al., 2017). The challenge is to meet this

51 demand in ways that are environmentally, socially and economically sustainable.  
52 Together with poultry, pork is one of the fastest growing livestock sectors and also one  
53 of the most consumed meats world-wide (FAO, 2019). Pig production is also widely  
54 recognised as one of the most efficient in term of carbon footprint and climate change  
55 potential compared to other animal protein source (Macleod et al., 2013). Ensuring  
56 optimal production is critical to ensure animals can fulfil their genetic potential and  
57 contribute to sustainable food source.

58

59 As a result of abrupt dietary, social stresses, and environmental changes, weaning is  
60 recognised as the most critical period in modern pig production associated with  
61 increase in disease risks, reduction in performance and welfare leading to significant  
62 economic loss (Gresse et al., 2017; Nowland et al., 2019). At weaning, the pig  
63 gastrointestinal tract (GIT) undergoes rapid changes in size, protein turnover rates,  
64 microbiome composition, and detrimental alterations in digestive and barrier functions  
65 (Pluske et al., 2018). Although the physiological changes faced by piglets over  
66 weaning have been well characterised, little is known about the underlying genes and  
67 pathways involved in these processes. Understanding how these changes are  
68 regulated or mediated is critical to improve pig production and consequently  
69 sustainable food production globally.

70

71 Furthermore, due to similarities in anatomy and physiology, the pig is widely  
72 recognised and utilised as a translational animal model to study human  
73 gastrointestinal diseases and to understand biological pathways related to mucosal  
74 function, development and nutritional regulation (Roura et al., 2016; Sciascia et al.,  
75 2016; Zhang et al., 2013). Previous studies have highlighted the importance of

76 improving the knowledge on molecular mechanism responsible for phenotypic  
77 differences especially at an early ages with the dual purpose of improving production  
78 and providing adequate models for human studies (Ayuso et al., 2015).

79 Recent advances in sequencing technologies now provides novel opportunities to  
80 comprehensively explore the complex gut ecosystem of humans and animals. RNA-  
81 sequencing (RNA-Seq) is a powerful high-throughput approach to profile gene  
82 expression that, in contrast with microarray-based technologies, allows for the  
83 characterisation and quantification of both known and unknown transcripts (Mach et  
84 al., 2014). Fundamental understanding of the host response to stress and its  
85 environment is paramount for the optimisation and development of application to  
86 improve pig health, productivity and welfare. To date, RNA-Seq has been used to  
87 study production traits of livestock animals but transcriptomic study in pigs using this  
88 technology is relatively scarce and have mainly focused on disease response or  
89 regulation mechanism of fat deposition and muscle development to evaluate growth  
90 and meat quality between pig genotypes (Piórkowska et al., 2018; Xu et al., 2019).

91  
92 Much attention and focus has been given to the gut microbiome and its taxonomic and  
93 metabolic changes through pig development and weaning (Bian et al., 2016; Frese et  
94 al., 2015; Guevarra et al., 2018a) but we are still lacking understanding about the host  
95 gene expression change in response to weaning. The current study aims to investigate  
96 the transcriptomic changes in the pig gut through weaning over time.

97

## 98 **Material and methods**

99

100 *Animals and experimental design*

101 All animals were treated in accordance with the University of Nottingham ethical  
102 guidelines and codes of practice applying to care and management of animals.  
103 Twenty-four litters (Landrace x Large White) over three batches were used in the study  
104 and housed at the School of Biosciences, Sutton Bonington Campus, University of  
105 Nottingham, UK. For prevention of iron deficiency and coccidiosis, all piglets received  
106 a 1 ml IM injection of Gleptosil (Alstoe Ltd, York, UK) 24 h after birth, and 0.7 ml of  
107 Baycox (Bayer, Newbury, UK) orally 3 d after birth. At 21 days of age, 6 weight-  
108 matched piglets per litter were randomly allocated by random selection of coded balls  
109 to treatment (baseline average weight at day 19:  $6.77 \pm 0.189$  kg). Piglets allocated to  
110 the weaned treatment were separated from their dam, moved and mixed with non-  
111 littermates in pens of 4 individuals and received ad lib commercial diet (wheat, whey  
112 powder and soya based) containing: 21.25% protein, 7.5% fat, 2.00% fibre, 5% ash,  
113 1.70% lysine, 13.80% moisture). Weaned piglets did not receive creep feed  
114 supplementation before weaning. Piglets allocated to the unweaned treatment as  
115 control remained with their dam and littermate up to 35 days of age with access to  
116 creep feed from day 25d of age (same commercial diet as above). No antibiotic or  
117 anthelmintic treatment were used during the trial. At day 1, 4 and 14 post-weaning:  
118 one weaned and one unweaned piglet from each litter were weighed euthanised by  
119 intraperitoneal injection of Dolethal (1 ml.kg<sup>-1</sup> body weight; 20% w/v Pentobarbitone  
120 Sodium, Vétoquinol, Buckingham, UK). At slaughter, body lesion was scored for each  
121 pig on a 3 point scale with 1 for no lesion, 2 for moderate scratches on back, flank,  
122 head, ear and tail, and 3 for intense, deep or bleeding scratches on back, flank, head,  
123 ear and tail.

124

125 *Intestinal measurements*

126 All sample processing and analysis was blinded using randomly generated numerical  
127 codes. Tissue samples from the 0.5 section of the colon were immediately collected  
128 post-slaughter, rinsed in sterile buffered saline solution and preserved in RNA later  
129 (Ambion, CA USA) at 4°C for 24-48h to allow tissue penetration then stored at -80°C.  
130 Tissue samples of the 0.5 small intestine (as proportions) along from the gastric  
131 pylorus to the ileocecal valve were fixed in Bouin's solution, embedded in paraffin and  
132 cut in 5 µm transverse sections. Histological section were stained with H&E for  
133 histometric measurement of villus length and crypt depth, with Periodic Acid Schiff  
134 stain for goblet cell counts (Matsuo et al., 1997) and with Toluidine Blue for  
135 quantification of mast cells (Moeser et al., 2007).

136 Secretory IgA (sIgA) was measured in ileal flushes using the methods previously  
137 described by Lessard et al. (2009). At slaughter, a 20 cm segment of ileum taken  
138 upstream from the cecum was flushed using 5 ml of sterile PBS, and centrifuged for  
139 10 min at 500 g. The supernatant was collected and stored at -80°C. Secretory IgA  
140 was measured in duplicate using a sandwich Porcine IgA ELISA Quantitation Kit  
141 (Bethyl Laboratories, TX, USA) according to the manufacturer protocol.

142

#### 143 *Data and Bioinformatics analysis*

144 Statistical analysis was performed in IBM SPSS v24 to determine the effect of weaning  
145 treatment at different time point treatment on pig weight, intestinal and blood  
146 measurement using linear mixed model analysis.

147 Gene expression cluster analysis was performed and revealed that sex was the only  
148 factor that showed a grouping effect. Therefore sex was included in the model as a  
149 confounder for the gene expression analysis.

150 Sequence alignment and read quantification was performed using the pseudo-  
151 alignment-based tool Kallisto v0.43. (Bray et al., 2016). Differential expression was  
152 determined using the Wald test in Sleuth v0.28.1 (Pimentel et al., 2017) with sex as a  
153 confounder in the model. Transcripts with a false detection rate corrected p-value <  
154 0.05 and a log2 fold change (log2FC) greater than 1 and less than minus 1 were  
155 considered to be differentially expressed, unless otherwise stated. False detection rate  
156 correction was performed using the Benjamini-Hochberg method (Benjamini and  
157 Hochberg, 1995).

158

159

## 160 **Results**

161

### 162 *Phenotypic data*

163 All piglets were found in good health during the trial and displayed no clinical signs of  
164 disease or scour. As expected, weaning caused a number physiological changes  
165 which were found to be time-dependant. Significant differences were observed in pig  
166 weight, blood or plasma measurements, body lesion scores and intestinal  
167 measurement (Table 1). These preliminary results also indicate the significant effect  
168 of time on almost all variables measured between day 1 and day 14 post weaning.  
169 This highlights that the pigs are undergoing rapid period of development at this age  
170 and the importance of designing studies using age-matched controls when evaluating  
171 the effect of weaning in pigs as opposed to using pre-weaning values as controls.

172

173 Plasma analysis revealed that cortisol levels remained stable over time in the  
174 unweaned group but increased almost 4-fold at day 1 and 2-fold at day 4 post weaning

175 in the weaned pigs indicating an activation of the HPA axis under weaning stress  
176 (Martínez-Miró et al., 2016). Interestingly, while most parameters measured in this  
177 study showed a rapid spike followed by a progressive return to the unweaned level by  
178 day 14, cortisol level still remained significantly higher at 14 days post weaning  
179 although to a lesser magnitude.

180

181 Haematology and biochemistry profiles are used as indicators of health status to  
182 evaluate the metabolic, nutritional and energy state of the pig. In blood, circulating  
183 granulocyte levels, haemoglobin and haematocrit were significantly increased in  
184 weaned pigs, while platelet counts decreased. In plasma, cholesterol, triglycerides  
185 and globulin levels decreased at day 4 and day 14 in the weaned group compared to  
186 unweaned pigs.

187

188 Measurement of intestinal architecture were also affected by weaning as previously  
189 reported, with significant reduction in jejunal villus height and villus/crypt ratio.  
190 However, villus width remains unaffected by weaning and crypt depth was increased.  
191 Goblet cell numbers in crypt and in villus remained unaffected in this study, however  
192 there was a significant decrease in mucosal mast cells at day 4 with an overall  
193 statistical trend for weaned pigs to show reduced mast cell count compared to  
194 unweaned controls.

195

196 Ileal sIgA was also greatly reduced at all time points post weaning, suggesting a  
197 decrease in immune protection from maternal milk. IgA plays an important role in the  
198 protection of mucosal surfaces against pathogens and is the principal immunoglobulin  
199 secreted in sow's milk (40% of the total whey protein) (Klobasa et al., 1987). sIgA is



200 considered the first line of defence and one of the most important factor for piglet  
201 growth and survival (Salmon et al., 2009). At weaning, removal of the piglets from the  
202 sow causes dramatic drop in gut IgA levels as observed in the current study and by  
203 others (Lessard et al., 2009), increasing the immune vulnerability of piglets post  
204 weaning.

205

### 206 *Transcriptomic analysis*

207 RNAseq (HiSeq) was used to identify differentially expressed transcripts (DET)  
208 between weaned and unweaned pigs in colonic tissue. An average of 52.3 million  
209 trimmed paired reads were obtained for each sample. Reads mapped as pairs (83.0-  
210 85.3%) to the porcine genome ref sequence (sus scrofa 10.2). The Wald test was used  
211 on TPM to establish the total number of DET between weaned and unweaned pigs for  
212 each time point and identified a total of 239 transcripts at  $q$  value  $\leq 0.1$  and  $FC \geq 2$ .  
213 The volcano plots visually represent significant DET for each time point and show an  
214 even distribution between up- and down-regulated genes (Figure 1).

215

216 The majority of transcripts 171 (71.6%) were found to be differentially expressed after  
217 1 day post weaning. After 4 days and 14 days post weaning only 67 (28.0%) and 1  
218 (0.4%) genes were differentially expressed between weaned and unweaned pigs,  
219 respectively (Figure 2). Among DET with the cut off values of  $Qval \leq 0.1$  &  $FC \geq 2$ , two  
220 transcripts were identified in common between day 1 and day 4 post weaning:  
221 ENSSSCT00000014128 and ENSSSCT00000017308 which are of unknown function  
222 (Figure 3). They were no DET common at all three time point or shared between day  
223 4 and 14 or day 1 and 14 post weaning. Transcription according to time point and

224 weaning treatment are shown in PCA plots and revealed distinct clusters between  
225 weaned and unweaned pigs across time points (Figure 4).

226

227 The full list of differentially expressed transcripts at  $Qval \leq 0.1$  &  $FC \geq 2$  is provided in  
228 Supplementary Table S1. DETs with  $FC > 2$  across all time points were subject to Gene  
229 Ontology (GO) and KEGG pathway analysis using NIPA  
230 <https://github.com/richarddemes/NIPA> to identify significantly enriched pathways  
231 between weaned and unweaned pigs at  $Qval \leq 0.05$  and minimum number of gene in  
232 term of two (Supplementary Table S2). Top 10 significantly enriched GO terms and  
233 KEGG pathways are shown in Figure 5.

234

## 235 **Discussion**

236 In this study, the typical characteristics previously reported in other studies were  
237 observed validating our weaning model. Piglet weights were negatively affected by  
238 weaning at day 1 and day 4 but recovered at day 14. Post-weaning growth check is a  
239 commonly reported problem in pigs with detrimental impact on life-time growth  
240 performances representing a large economic loss to the industry (Collins et al., 2017)

241

242 Evidence of stress was also observed in this study with elevated plasma cortisol and  
243 increased lesion scores in the weaned pigs. Following post-weaning mixing, intense  
244 aggressive patterns especially directed to facial, belly and anogenital regions has been  
245 reported in previous studies and were shown to be linked with the establishment of  
246 social hierarchy between unacquainted pigs (Meese and Ewbank, 1973; Turner et al.,  
247 2009). In agreement with previous studies, the majority of lesions found in this study  
248 were found on the head, ears and shoulders (data not shown), suggesting aggressive

249 frontal confrontation, however no direct behavioural observation were performed so  
250 other behaviour which could have caused lesions could not be excluded. Interestingly,  
251 lesion scores in the unweaned piglets were found at 14 d, when pigs were 35 day of  
252 age and had reached over 12 kg, suggesting that despite creep feed available, they  
253 may have been some possible agonistic behaviour between littermates in competition  
254 for food source as the milk yield from the sow starts to decrease at this stage of  
255 lactation (Hansen et al., 2012). Weaning age is a controversial topic of discussion  
256 regarding performance and welfare, with typical weaning age varying between  
257 production systems and countries. Most studies agree that weaning at an early age  
258 (<21 days old) exacerbate the effect of weaning stress (Smith et al., 2010; Xun et al.,  
259 2018) but our results suggest that later weaning at 35d could also have negative  
260 impact on the piglets welfare.

261

262 Measurements of intestinal structures such as villus and crypt have been commonly  
263 used to evaluate gut health as a measure of absorptive capacities for nutrients  
264 (Bontempo et al., 2006; Le Bon et al., 2010). As reported by others, the current study  
265 shows that villus morphometry is impaired by weaning. Although feed intake was not  
266 measured in this trial, low feed intake post-weaning is considered one of the main  
267 aetiological factors for morphological changes in gut physiology due to the importance  
268 of enteral stimulation for mucosal homeostasis (Spreeuwenberg et al., 2001). Villus  
269 atrophy during the first few days post-weaning has been commonly reported and is  
270 often associated with loss in barrier function, decreased enzyme activity and  
271 decreased performance such as seen in this study (Lallès, 2008). Interestingly, the  
272 effect observed on the crypt depth may indicate an increased level of cellular activity  
273 and turnover in the intestinal mucosa in response to weaning.

274

275 This study has revealed a large number of genes up and down regulated as  
276 consequences of weaning in the pig colon highlighting the profound physiological  
277 impact of weaning on healthy pigs. As the genome of the domestic pig is relatively  
278 recent in comparison with other model species (Groenen, 2016), many genes and  
279 transcripts still have limited annotation and identified function to this date. Differential  
280 gene expression in the gut of weaned pigs has previously been investigated using  
281 microarray-based techniques (Inoue et al., 2015; Wang et al., 2008), however the  
282 number of genes and pathways identified were limited to known transcripts, while RNA  
283 seq platform offers a more comprehensive view of the transcriptome including genes  
284 of unknown functions. Freeman et al. (2012) documented the first transcriptomic atlas  
285 of the domestic pig describing tissue-specific gene expression and emphasised the  
286 importance to generate and increase our knowledge of transcriptomic expression to  
287 document and understand the function of many genes with limited functional  
288 annotation. The transcriptomic profile of pig along the small intestine has been  
289 previously evaluated in the duodenum, ileum, jejunum and ileal Peyer's Patches of  
290 healthy growing pigs (Mach et al., 2014), but relatively little is known about the colon  
291 in pigs. The current study identified many genes associated with weaning with and  
292 without known function, contributing to advancing out fundamental understanding of  
293 the pig genome.

294

295 The large majority of differentially expressed transcripts were found to peak on day 1  
296 post weaning and progressively returned to unweaned level by day 14, emphasising  
297 the abrupt response of pigs to weaning (Lallès et al., 2007). There was little overlap in  
298 transcripts between time points suggesting a coordinated regulation of the host in

299 response to weaning. These findings could inform selection of appropriate time points  
300 for further trials in weaned pigs.

301

302 Due to the large number of DET identified in this study, the main focus of this  
303 discussion is on pathways significantly affected by weaning rather than individual  
304 genes. Metabolic, immune and barrier function activities have previously been  
305 implicated with weaning response in both the small and large intestine but the  
306 underlying mechanism for these changes have not been previously identified. In the  
307 current study, we found several pathways related to microbial response and immune  
308 functions activated post-weaning; specifically, NOD-like receptors, Toll-like receptor  
309 and JAK-STAT signalling pathways are shown to be significantly activated. These  
310 signalling pathways indicate a cellular response to Microbial Associated Molecular  
311 Patterns (MAMPs) that drives the activation innate immune response. As such, we  
312 also observe positive regulation of Interferon alpha production and Interferon gamma  
313 mediated pathways.

314

315 In agreement with these results, Wang et al. (2008) also reported that weaning at 21  
316 days of age showed an increase in expression of genes associated with oxidative  
317 stress and immune activation but decreased expression of genes related to nutrient  
318 utilisation and cell proliferation in the jejunum of pigs using microarray analysis. A  
319 previous study also reported that pigs weaned at a later age (28 days) showed  
320 increase in pro-inflammatory cytokines expression in the small intestine and colon  
321 during the first two days post weaning before returning to pre-weaned level after 8  
322 days post weaning (Pié et al., 2004). The interferon response following weaning stress  
323 in pigs has previously been characterised and showed that weaning causes the

324 release of IFN- $\alpha$  and the transient shut-off of the corresponding gene transcriptions in  
325 PBMC (Razzuoli et al., 2011). Bailey (2009) also demonstrated that weaned pigs  
326 develop an early and transient immune response to novel dietary antigens at weaning  
327 before establishing tolerance (Everaert et al., 2017).

328

329 In addition, Moeser et al. (2017) demonstrated that colonic and jejunal transepithelial  
330 resistance was increased resulting in impaired permeability of the gut barrier as a  
331 result of weaning, which may facilitate infiltration of luminal component such as  
332 bacteria or bacterial products. Here we see at least two GO biological terms that would  
333 agree with this hypothesis: “cellular responses to LPS” and “response to bacterium”  
334 where genes such as NOS2, CD274, IRF3, CXCL11 and ACOD1, are upregulated.

335

336 The immune regulation observed through our transcriptomic results also reflects the  
337 significant increase in granulocyte levels found in blood, suggesting both a local and  
338 systemic activation of immunity in response to weaning. The combined effect of  
339 immune and stress activation can lead to an energy cost whereby growing animals  
340 divert their energy resource towards these responses instead of growth which can  
341 explain reduced performance observed in weaned pigs. In growing pigs,  
342 transcriptomic multi-tissue analysis revealed that activated immune response, protein  
343 metabolism, defence against pathogens and oxidative stress were the main biological  
344 pathways associated with feed efficiencies (Gondret et al., 2017). The authors  
345 suggested that dietary intervention with anti-inflammatory or antioxidant properties  
346 could be evaluated to improve efficiencies in growing pigs. As feed accounts for more  
347 than 60% of the cost of food production, improving feed efficiency is a major target to  
348 improve profitability of the pig industry (Jing et al., 2015).

349

350 In recent years, significant progress has been made in characterising the complex  
351 network of communication and signals between the nervous, immune and endocrine  
352 systems of the gut. The role of the gut-brain axis in neurological disorders is well  
353 recognised but its mechanism poorly understood. Activation of the gut brain axis under  
354 stressful stimuli has been shown to stimulates inflammatory pathways, alteration of  
355 gut barrier function and has been associated with changes in intestinal microbiota in  
356 humans and animal models (Martin et al., 2018). The multifactorial challenges faced  
357 by pigs at weaning have provoked changes in behavioural response and elevated  
358 corticoids levels as shown in previous studies (Campbell et al., 2013; Flynn and Wu,  
359 1997; Li et al., 2016). These could be in part responsible for the immune activation  
360 observed at the transcriptomic level in the colon but would require further investigation  
361 to determine if these changes can be attributed to brain.

362

363 The colon also harbours the richest and most diverse microbial population of the gut.  
364 In recent years, a large number of studies have documented the development of the  
365 gut microbiota of the pig over time (Frese et al., 2015; Guevarra et al., 2018b; Han et  
366 al., 2018; Ke et al., 2019; Mach et al., 2015; Wang et al., 2019). As a transition from a  
367 milk-based to a plant-based diet, weaning is typically associated with a decrease in  
368 gut microbial diversity and major shifts in bacterial taxa composition (Guevarra et al.,  
369 2019). In line with other inflammatory gut disorders, such as IBD or Crohn's disease,  
370 the causal relation effect between inflammation and microbiota is unclear. Recently,  
371 several studies have provided evidence to suggest that inflammation in gut tissue is  
372 conducive to the proliferation of gut bacteria that contribute to pathogenesis or disease  
373 development (Zeng et al., 2017). In the current study, we observe activation of immune

374 signalling pathways and pro-inflammatory cytokines in the early days post weaning,  
375 and we also observe regulation of pathways involved in oxido-reductase activity.  
376 Amongst the activated pathways related to anti-microbial defence, genes involved in  
377 oxidative burst such as NOS2 (Nitric oxide synthase 2) and NOX1 (NAPDH oxidase  
378 1) are upregulated which are involved in the production of nitric oxide and superoxide  
379 radicals. These nitrogen rich compounds are rapidly converted into nitrate (NO<sub>3</sub><sup>-</sup>) in  
380 the lumen providing favourable condition for the growth and proliferation of gut bacteria  
381 that carry nitrate reductase genes such as *Enterobacteriaceae* including *E. coli* and  
382 *Salmonella* (Winter et al., 2013). In addition, inflammatory conditions provide  
383 increased level of luminal oxygen due to elevated blood flow and haemoglobin, this  
384 favours aerobic respiration of *Enterobacteriaceae* while inhibiting the growth of  
385 obligate anaerobes such as *Bacterioides* and *Clostridia* (Zeng et al., 2017).  
386 *Enterobacteriaceae* have a detrimental effect on pig health and growth and is one of  
387 the leading cause of diarrhoea in pig production (Rhouma et al., 2017). *E. coli* is highly  
388 prevalent post-weaning and can lead to mortality and zoonosis (Luppi, 2017). As a  
389 result, antibiotic usage is commonly used to treat and prevent *E.coli* infection and have  
390 led to increasing reports in colistin-resistant *E. coli* found in pigs (Rhouma et al., 2017).  
391 Tackling post weaning inflammatory response could represent a step towards  
392 reduction in antimicrobial use in pig production.

393

394 At weaning, pigs are abruptly transitioned from sow's milk to a complex plant-based  
395 diet with distinct nutritional profile and as such transcriptomic modulation of pathways  
396 involved in nutritional metabolism would be expected. Whilst the majority of nutrient  
397 digestion and absorption takes place in the small intestine, the main role of the colon  
398 in digestive functions is to reabsorb water and electrolytes. However, in the current



399 study, biosynthesis of amino acids, in particular arginine biosynthesis was the second  
400 most significant KEGG pathway enriched in weaned pigs via the up regulation of  
401 argininosuccinate synthase 1 gene (ASS1). Arginine is an essential amino acid that  
402 play key roles in nutrition and metabolism. Young mammals, including piglets, have a  
403 particularly high requirement of arginine for growth and metabolic function. As  
404 enterocytes actively transport and metabolise arginine, the gut is an important organ  
405 for maintaining body arginine homeostasis (Wu et al., 2018). L-Arginine is also  
406 the biological precursor of nitric oxide (NO), and alteration of arginine uptake and  
407 metabolism has been found to be associated with inflammatory bowel diseases, such  
408 as ulcerative colitis (Coburn et al., 2016; Luiking et al., 2012; Stuehr, 2004). In post-  
409 weaning pigs, arginine metabolism in the gut is critical to maintain normal intestinal  
410 physiology and for efficient utilisation of dietary protein (Wu et al., 2004). In addition,  
411 glucocorticoids plays an important role in regulating the enhanced arginine metabolism  
412 in the enterocytes of post-weaning pigs (Flynn and Wu, 1997). Arginine availability in  
413 the digestive tract plays a key role in maintaining intestinal immune homeostasis under  
414 conditions of inflammation and infection (Das et al., 2010; Fritz, 2013; Singh et al.,  
415 2019). A number of studies have reported that arginine administration significantly  
416 attenuate intestinal inflammation under physiological and pathological conditions  
417 including intestinal dysfunction in weaned piglets, and enhancement of growth  
418 performance and survival (Che et al., 2019; Wu et al., 2010; Zheng et al., 2018). Other  
419 models have reported that arginine supplementation also down-regulated JAK-STAT  
420 signalling pathway and attenuated the inflammatory response, which exerted  
421 protective effects on the intestine of chickens challenged with *C. perfringens* ((Zhang  
422 et al., 2019). Arginine has been shown to exert anti-inflammatory and antioxidant  
423 effects in IPEC-J2 cells challenged with LPS (Qiu et al., 2019). Reports of reduced

424 arginine availability in conditions of acute and chronic stress, often associated with  
425 increase in NOS2 activity are in agreement with the results of the current study (Luiking  
426 et al., 2012). The specific mechanisms of regulation and interaction between cortisol,  
427 NOS, immune response, and arginine metabolism observed in this study remain  
428 unknown, but could provide further evidence to suggest that arginine requirement  
429 should be carefully evaluated when designing diet to support pigs during the weaning  
430 transition.

431

432 Finally, although the current study has identified a large number of transcripts and  
433 pathways regulated at the mRNA level, it is likely that post-transcriptional and post  
434 translational regulatory mechanisms also regulate the host response to weaning and  
435 should be investigated in future studies as comprehensive and complementary  
436 approach to transcriptomic methods.

437

## 438 **Conclusion**

439 Weaning is a multifactorial event that results in complex interactions between gut,  
440 brain and metabolism. Understanding these responses and the molecular  
441 mechanisms that underpins these changes is critical to improve sustainable pig  
442 production. This study has identified multiple genes and pathways differentially  
443 regulated by weaning. These results revealed that pigs going through the weaning  
444 transition undergo a transient period of inflammatory state with temporary breakdown  
445 of barrier functions in the gut. The condition of the inflamed gut have been previously  
446 shown to provide favourable growth advantage for the expansion of  
447 *Enterobacteriaceae*, a leading cause of enteric disease in pigs. Under the  
448 experimental and controlled conditions of this trial, differential gene expression

449 returned to unweaned control levels by day 14 post weaning. However, the translation  
450 of the study results to commercial production setting remains to be explored.

451

452 Indicators of weaning stress and response have previously been used including  
453 histology, systemic markers of immunity and characterisation of the microbiota  
454 composition. Here, we have identified a number of target gene and pathways that  
455 could also be used as biomarker of intestinal inflammation to complement these  
456 measures. Together, these could provide valuable tools to monitor host response post-  
457 weaning, especially in context of intervention strategies aimed to reduce antibiotic use  
458 and improve pig health and performance. Finally, as weaning in pigs have been used  
459 as a model for stress-related bowel dysfunction in humans, it would be of interest to  
460 investigate if the similar transcriptomic changes are involved in these disorders.

461

#### 462 **Acknowledgements**

463 We acknowledge Lallemand Inc, the University of Nottingham and Nottingham Trent  
464 University for funding. We also acknowledge the team at Bio-Support Unit at the  
465 University of Nottingham for help in running the trial. We thank Prof. Ian Connerton for  
466 critical reading and review of the manuscript.

467

#### 468 **Declaration of interest**

469 The authors declare no conflict of interest.

470

#### 471 **References**

472 Ayuso, M., Fernández, A., Núñez, Y., Benitez, R., Isabel, B., Barragán, C.,

473 Fernández, A.I., Rey, A.I., Medrano, J.F., Cánovas, Á., González-Bulnes, A.,

- 474 López-Bote, C., Ovilo, C., 2015. Comparative analysis of muscle transcriptome  
475 between pig genotypes identifies genes and regulatory mechanisms associated  
476 to growth, Fatness and metabolism. PLoS One.  
477 <https://doi.org/10.1371/journal.pone.0145162>
- 478 Bailey, M., 2009. The mucosal immune system: Recent developments and future  
479 directions in the pig. Dev. Comp. Immunol.  
480 <https://doi.org/10.1016/j.dci.2008.07.003>
- 481 Benjamini, Y., Hochberg, Y., 1995. Controlling the False Discovery Rate: A Practical  
482 and Powerful Approach to Multiple Testing. J. R. Stat. Soc. Ser. B.  
483 <https://doi.org/10.1111/j.2517-6161.1995.tb02031.x>
- 484 Bian, G., Ma, S., Zhu, Z., Su, Y., Zoetendal, E.G., Mackie, R., Liu, J., Mu, C., Huang,  
485 R., Smidt, H., Zhu, W., 2016. Age, introduction of solid feed and weaning are  
486 more important determinants of gut bacterial succession in piglets than breed  
487 and nursing mother as revealed by a reciprocal cross-fostering model. Environ.  
488 Microbiol. <https://doi.org/10.1111/1462-2920.13272>
- 489 Bontempo, V., Di Giancamillo, A., Savoini, G., Dell'Orto, V., Domeneghini, C., 2006.  
490 Live yeast dietary supplementation acts upon intestinal morpho-functional  
491 aspects and growth in weanling piglets. Anim. Feed Sci. Technol.  
492 <https://doi.org/10.1016/j.anifeedsci.2005.12.015>
- 493 Bray, N.L., Pimentel, H., Melsted, P., Pachter, L., 2016. Near-optimal probabilistic  
494 RNA-seq quantification. Nat. Biotechnol. <https://doi.org/10.1038/nbt.3519>
- 495 Campbell, J.M., Crenshaw, J.D., Polo, J., 2013. The biological stress of early  
496 weaned piglets. J. Anim. Sci. Biotechnol. [https://doi.org/10.1186/2049-1891-4-](https://doi.org/10.1186/2049-1891-4-19)  
497 19
- 498 Che, D., Adams, S., Zhao, B., Qin, G., Jiang, H., 2019. Effects of Dietary L-arginine

- 499       Supplementation from Conception to Post- Weaning in Piglets. *Curr. Protein*  
500       Pept. Sci. 20, 736–749. <https://doi.org/10.2174/1389203720666190125104959>
- 501 Coburn, L.A., Horst, S.N., Allaman, M.M., Brown, C.T., Williams, C.S., Hodges, M.E.,  
502       Druce, J.P., Beaulieu, D.B., Schwartz, D.A., Wilson, K.T., 2016. L-Arginine  
503       Availability and Metabolism Is Altered in Ulcerative Colitis. *Inflamm. Bowel Dis.*  
504       22, 1847–1858. <https://doi.org/10.1097/MIB.0000000000000790>
- 505 Collins, C.L., Pluske, J.R., Morrison, R.S., McDonald, T.N., Smits, R.J., Henman,  
506       D.J., Stensland, I., Dunshea, F.R., 2017. Post-weaning and whole-of-life  
507       performance of pigs is determined by live weight at weaning and the complexity  
508       of the diet fed after weaning. *Anim. Nutr. (Zhongguo xu mu shou yi xue hui)* 3,  
509       372–379. <https://doi.org/10.1016/j.aninu.2017.01.001>
- 510 Das, P., Lahiri, Amit, Lahiri, Ayan, Chakravorty, D., 2010. Modulation of the arginase  
511       pathway in the context of microbial pathogenesis: A metabolic enzyme  
512       moonlighting as an immune modulator. *PLoS Pathog.*  
513       <https://doi.org/10.1371/journal.ppat.1000899>
- 514 Everaert, N., Van Cruchten, S., Weström, B., Bailey, M., Van Ginneken, C.,  
515       Thymann, T., Pieper, R., 2017. A review on early gut maturation and  
516       colonization in pigs, including biological and dietary factors affecting gut  
517       homeostasis. *Anim. Feed Sci. Technol.*  
518       <https://doi.org/10.1016/j.anifeedsci.2017.06.011>
- 519 FAO, 2019. Meat market review. Food Agric. Organ. United Nations.
- 520 Flynn, N.E., Wu, G., 1997. Glucocorticoids Play an Important Role in Mediating the  
521       Enhanced Metabolism of Arginine and Glutamine in Enterocytes of Postweaning  
522       Pigs. *J. Nutr.* <https://doi.org/10.1093/jn/127.5.732>
- 523 Freeman, T.C., Ivens, A., Baillie, J.K., Beraldi, D., Barnett, M.W., Dorward, D.,

- 524 Downing, A., Fairbairn, L., Kapetanovic, R., Raza, S., Tomoiu, A., Alberio, R.,  
525 Wu, C., Su, A.I., Summers, K.M., Tuggle, C.K., Archibald, A.L., Hume, D.A.,  
526 2012. A gene expression atlas of the domestic pig. *BMC Biol.*  
527 <https://doi.org/10.1186/1741-7007-10-90>
- 528 Frese, S.A., Parker, K., Calvert, C.C., Mills, D.A., 2015. Diet shapes the gut  
529 microbiome of pigs during nursing and weaning. *Microbiome.*  
530 <https://doi.org/10.1186/s40168-015-0091-8>
- 531 Fritz, J.H., 2013. Arginine cools the inflamed gut. *Infect. Immun.*  
532 <https://doi.org/10.1128/IAI.00789-13>
- 533 Gondret, F., Vincent, A., Houée-Bigot, M., Siegel, A., Lagarrigue, S., Causeur, D.,  
534 Gilbert, H., Louveau, I., 2017. A transcriptome multi-tissue analysis identifies  
535 biological pathways and genes associated with variations in feed efficiency of  
536 growing pigs. *BMC Genomics.* <https://doi.org/10.1186/s12864-017-3639-0>
- 537 Gresse, R., Chaucheyras-Durand, F., Fleury, M.A., Van de Wiele, T., Forano, E.,  
538 Blanquet-Diot, S., 2017. Gut Microbiota Dysbiosis in Postweaning Piglets:  
539 Understanding the Keys to Health. *Trends Microbiol.*  
540 <https://doi.org/10.1016/j.tim.2017.05.004>
- 541 Groenen, M.A.M., 2016. A decade of pig genome sequencing: A window on pig  
542 domestication and evolution. *Genet. Sel. Evol.* [https://doi.org/10.1186/s12711-](https://doi.org/10.1186/s12711-016-0204-2)  
543 [016-0204-2](https://doi.org/10.1186/s12711-016-0204-2)
- 544 Guevarra, R.B., Hong, S.H., Cho, J.H., Kim, B.R., Shin, J., Lee, J.H., Kang, B.N.,  
545 Kim, Y.H., Wattanaphansak, S., Isaacson, R.E., Song, M., Kim, H.B., 2018a.  
546 The dynamics of the piglet gut microbiome during the weaning transition in  
547 association with health and nutrition. *J. Anim. Sci. Biotechnol.* 9, 1–9.  
548 <https://doi.org/10.1186/s40104-018-0269-6>

- 549 Guevarra, R.B., Hong, S.H., Cho, J.H., Kim, B.R., Shin, J., Lee, J.H., Kang, B.N.,  
550 Kim, Y.H., Wattanaphansak, S., Isaacson, R.E., Song, M., Kim, H.B., 2018b.  
551 The dynamics of the piglet gut microbiome during the weaning transition in  
552 association with health and nutrition. *J. Anim. Sci. Biotechnol.*  
553 <https://doi.org/10.1186/s40104-018-0269-6>
- 554 Guevarra, R.B., Lee, J.H., Lee, S.H., Seok, M.J., Kim, D.W., Kang, B.N., Johnson,  
555 T.J., Isaacson, R.E., Kim, H.B., 2019. Piglet gut microbial shifts early in life:  
556 Causes and effects. *J. Anim. Sci. Biotechnol.* [https://doi.org/10.1186/s40104-](https://doi.org/10.1186/s40104-018-0308-3)  
557 [018-0308-3](https://doi.org/10.1186/s40104-018-0308-3)
- 558 Han, G.G., Lee, J.Y., Jin, G.D., Park, J., Choi, Y.H., Kang, S.K., Chae, B.J., Kim,  
559 E.B., Choi, Y.J., 2018. Tracing of the fecal microbiota of commercial pigs at five  
560 growth stages from birth to shipment. *Sci. Rep.* 8.  
561 <https://doi.org/10.1038/s41598-018-24508-7>
- 562 Hansen, A. V., Strathe, A.B., Kebreab, E., France, J., Theil, P.K., 2012. Predicting  
563 milk yield and composition in lactating sows: A Bayesian approach. *J. Anim. Sci.*  
564 <https://doi.org/10.2527/jas.2011-4788>
- 565 Henchion, M., Hayes, M., Mullen, A., Fenelon, M., Tiwari, B., 2017. Future Protein  
566 Supply and Demand: Strategies and Factors Influencing a Sustainable  
567 Equilibrium. *Foods.* <https://doi.org/10.3390/foods6070053>
- 568 Inoue, R., Tsukahara, T., Nakatani, M., Okutani, M., Nishibayashi, R., Ogawa, S.,  
569 Harayama, T., Nagino, T., Hatanaka, H., Fukuta, K., Romero-Pérez, G.A.,  
570 Ushida, K., Kelly, D., 2015. Weaning markedly affects transcriptome profiles and  
571 Peyer's patch development in Piglet ileum. *Front. Immunol.*  
572 <https://doi.org/10.3389/fimmu.2015.00630>
- 573 Jing, L., Hou, Y., Wu, H., Miao, Y., Li, X., Cao, J., Michael Brameld, J., Parr, T.,

- 574 Zhao, S., 2015. Transcriptome analysis of mRNA and miRNA in skeletal muscle  
575 indicates an important network for differential Residual Feed Intake in pigs. *Sci.*  
576 *Rep.* <https://doi.org/10.1038/srep11953>
- 577 Ke, S., Fang, S., He, M., Huang, X., Yang, H., Yang, B., Chen, C., Huang, L., 2019.  
578 Age-based dynamic changes of phylogenetic composition and interaction  
579 networks of health pig gut microbiome feeding in a uniformed condition. *BMC*  
580 *Vet. Res.* 15, 1–13. <https://doi.org/10.1186/s12917-019-1918-5>
- 581 Klobasa, F., Werhahn, E., Butler, J.E., 1987. Composition of sow milk during  
582 lactation. *J. Anim. Sci.* <https://doi.org/10.2527/jas1987.6451458x>
- 583 Lallès, J.-P., 2008. Nutrition and gut health of the young pig around weaning : what  
584 news ? *Arch. Zootech.* 11, 5–15.
- 585 Lallès, J.P., Bosi, P., Smidt, H., Stokes, C.R., 2007. Nutritional management of gut  
586 health in pigs around weaning. *Proc. Nutr. Soc.*  
587 <https://doi.org/10.1017/S0029665107005484>
- 588 Le Bon, M., Davies, H.E., Glynn, C., Thompson, C., Madden, M., Wiseman, J.,  
589 Dodd, C.E.R., Hurdidge, L., Payne, G., Le Treut, Y., Craigon, J., Töttemeyer, S.,  
590 Mellits, K.H., 2010. Influence of probiotics on gut health in the weaned pig.  
591 *Livest. Sci.* <https://doi.org/10.1016/j.livsci.2010.06.058>
- 592 Lessard, M., Dupuis, M., Gagnon, N., Nadeau, É., Matte, J.J., Goulet, J., Fairbrother,  
593 J.M., 2009. Administration of *Pediococcus acidilactici* or *Saccharomyces*  
594 *cerevisiae* boulardii modulates development of porcine mucosal immunity and  
595 reduces intestinal bacterial translocation after *Escherichia coli* challenge. *J.*  
596 *Anim. Sci.* <https://doi.org/10.2527/jas.2008-0919>
- 597 Li, L.A., Yang, J.J., Li, Y., Lv, L., Xie, J.J., Du, G.M., Jin, T.M., Qin, S.Y., Jiao, X.L.,  
598 2016. Effect of weaning age on cortisol release in piglets. *Genet. Mol. Res.*



- 599 <https://doi.org/10.4238/gmr.15027693>
- 600 Luiking, Y.C., Ten Have, G.A.M., Wolfe, R.R., Deutz, N.E.P., 2012. Arginine de novo  
601 and nitric oxide production in disease states. *Am. J. Physiol. - Endocrinol.*  
602 *Metab.* <https://doi.org/10.1152/ajpendo.00284.2012>
- 603 Luppi, A., 2017. Swine enteric colibacillosis: Diagnosis, therapy and antimicrobial  
604 resistance. *Porc. Heal. Manag.* <https://doi.org/10.1186/s40813-017-0063-4>
- 605 Mach, N., Berri, M., Esquerré, D., Chevaleyre, C., Lemonnier, G., Billon, Y., Lepage,  
606 P., Oswald, I.P., Doré, J., Rogel-Gaillard, C., Estellé, J., 2014. Extensive  
607 expression differences along porcine small intestine evidenced by transcriptome  
608 sequencing. *PLoS One.* <https://doi.org/10.1371/journal.pone.0088515>
- 609 Mach, N., Berri, M., Estellé, J., Levenez, F., Lemonnier, G., Denis, C., Leplat, J.J.,  
610 Chevaleyre, C., Billon, Y., Doré, J., Rogel-Gaillard, C., Lepage, P., 2015. Early-  
611 life establishment of the swine gut microbiome and impact on host phenotypes.  
612 *Environ. Microbiol. Rep.* <https://doi.org/10.1111/1758-2229.12285>
- 613 Macleod, M., Gerber, P., Mottet, A., Tempio, G., Falcucci, A., Opio, C., Vellinga, T.,  
614 Henderson, B., Steinfeld, H., 2013. Greenhouse gas emissions from pig and  
615 chicken supply chains - A global life cycle assessment, Food and Agriculture  
616 Organization of the United Nations (FAO).
- 617 Martin, C.R., Osadchiy, V., Kalani, A., Mayer, E.A., 2018. The Brain-Gut-Microbiome  
618 Axis. *CMGH.* <https://doi.org/10.1016/j.jcmgh.2018.04.003>
- 619 Martínez-Miró, S., Tecles, F., Ramón, M., Escribano, D., Hernández, F., Madrid, J.,  
620 Orengo, J., Martínez-Subiela, S., Manteca, X., Cerón, J.J., 2016. Causes,  
621 consequences and biomarkers of stress in swine: An update. *BMC Vet. Res.*  
622 <https://doi.org/10.1186/s12917-016-0791-8>
- 623 Matsuo, K., Ota, H., Akamatsu, T., Sugiyama, A., Katsuyama, T., 1997.

- 624 Histochemistry of the surface mucous gel layer of the human colon. Gut.  
625 <https://doi.org/10.1136/gut.40.6.782>
- 626 Meese, G.B., Ewbank, R., 1973. The establishment and nature of the dominance  
627 hierarchy in the domesticated pig. Anim. Behav. [https://doi.org/10.1016/S0003-](https://doi.org/10.1016/S0003-3472(73)80074-0)  
628 3472(73)80074-0
- 629 Moeser, A.J., Pohl, C.S., Rajput, M., 2017. Weaning stress and gastrointestinal  
630 barrier development: Implications for lifelong gut health in pigs. Anim. Nutr.  
631 <https://doi.org/10.1016/j.aninu.2017.06.003>
- 632 Moeser, A.J., Ryan, K.A., Nighot, P.K., Blikslager, A.T., 2007. Gastrointestinal  
633 dysfunction induced by early weaning is attenuated by delayed weaning and  
634 mast cell blockade in pigs. Am. J. Physiol. - Gastrointest. Liver Physiol.  
635 <https://doi.org/10.1152/ajpgi.00304.2006>
- 636 Nowland, T.L., Plush, K.J., Barton, M., Kirkwood, R.N., 2019. Development and  
637 Function of the Intestinal Microbiome and Potential Implications for Pig  
638 Production. Anim. an open access J. from MDPI 9.  
639 <https://doi.org/10.3390/ani9030076>
- 640 Pié, S., Lallès, J.P., Blazy, F., Laffitte, J., Sève, B., Oswald, I.P., 2004. Weaning Is  
641 Associated with an Upregulation of Expression of Inflammatory Cytokines in the  
642 Intestine of Piglets. J. Nutr. <https://doi.org/10.1093/jn/134.3.641>
- 643 Pimentel, H., Bray, N.L., Puente, S., Melsted, P., Pachter, L., 2017. Differential  
644 analysis of RNA-seq incorporating quantification uncertainty. Nat. Methods.  
645 <https://doi.org/10.1038/nmeth.4324>
- 646 Piórkowska, K., Żukowski, K., Ropka-Molik, K., Tyra, M., Gurgul, A., 2018. A  
647 comprehensive transcriptome analysis of skeletal muscles in two Polish pig  
648 breeds differing in fat and meat quality traits. Genet. Mol. Biol.

- 649 <https://doi.org/10.1590/1678-4685-gmb-2016-0101>
- 650 Pluske, J.R., Turpin, D.L., Kim, J.C., 2018. Gastrointestinal tract (gut) health in the  
651 young pig. *Anim. Nutr.* <https://doi.org/10.1016/j.aninu.2017.12.004>
- 652 Razzuoli, E., Villa, R., Sossi, E., Amadori, M., 2011. Characterization of the  
653 interferon- $\alpha$  response of pigs to the weaning stress. *J. Interf. Cytokine Res.*  
654 <https://doi.org/10.1089/jir.2010.0041>
- 655 Rhouma, M., Fairbrother, J.M., Beaudry, F., Letellier, A., 2017. Post weaning  
656 diarrhea in pigs: Risk factors and non-colistin-based control strategies. *Acta Vet.*  
657 *Scand.* <https://doi.org/10.1186/s13028-017-0299-7>
- 658 Roura, E., Koopmans, S.J., Lallès, J.P., Le Huerou-Luron, I., De Jager, N.,  
659 Schuurman, T., Val-Laillet, D., 2016. Critical review evaluating the pig as a  
660 model for human nutritional physiology. *Nutr. Res. Rev.*  
661 <https://doi.org/10.1017/S0954422416000020>
- 662 Salmon, H., Berri, M., Gerds, V., Meurens, F., 2009. Humoral and cellular factors of  
663 maternal immunity in swine. *Dev. Comp. Immunol.*  
664 <https://doi.org/10.1016/j.dci.2008.07.007>
- 665 Sciascia, Q., Daş, G., Metges, C.C., 2016. Review: The pig as a model for humans:  
666 Effects of nutritional factors on intestinal function and health. *J. Anim. Sci.*  
667 <https://doi.org/10.2527/jas2015-9788>
- 668 Singh, K., Gobert, A.P., Coburn, L.A., Barry, D.P., Allaman, M., Asim, M., Luis, P.B.,  
669 Schneider, C., Milne, G.L., Boone, H.H., Shilts, M.H., Washington, M.K., Das,  
670 S.R., Piazzuelo, M.B., Wilson, K.T., 2019. Dietary arginine regulates severity of  
671 experimental colitis and affects the colonic microbiome. *Front. Cell. Infect.*  
672 *Microbiol.* <https://doi.org/10.3389/fcimb.2019.00066>
- 673 Smith, F., Clark, J.E., Overman, B.L., Tozel, C.C., Huang, J.H., Rivier, J.E.F.,

- 674 Blisklager, A.T., Moeser, A.J., 2010. Early weaning stress impairs development  
675 of mucosal barrier function in the porcine intestine. *Am. J. Physiol. -*  
676 *Gastrointest. Liver Physiol.* <https://doi.org/10.1152/ajpgi.00081.2009>
- 677 Spreeuwenberg, M.A.M., Verdonk, J.M.A.J., Gaskins, H.R., Verstegen, M.W.A.,  
678 2001. Small Intestine Epithelial Barrier Function Is Compromised in Pigs with  
679 Low Feed Intake at Weaning. *J. Nutr.* <https://doi.org/10.1093/jn/131.5.1520>
- 680 Stuehr, D.J., 2004. Enzymes of the L-arginine to nitric oxide pathway. *J. Nutr.* 134,  
681 2748S-2751S; discussion 2765S-2767S.  
682 <https://doi.org/10.1093/jn/134.10.2748S>
- 683 Turner, S.P., Roehe, R., D'Eath, R.B., Ison, S.H., Farish, M., Jack, M.C., Lundeheim,  
684 N., Rydhmer, L., Lawrence, A.B., 2009. Genetic validation of postmixing skin  
685 injuries in pigs as an indicator of aggressiveness and the relationship with  
686 injuries under more stable social conditions. *J. Anim. Sci.*  
687 <https://doi.org/10.2527/jas.2008-1558>
- 688 Wang, J., Chen, L., Li, P., Li, X., Zhou, H., Wang, F., Li, D., Yin, Y., Wu, G., 2008.  
689 Gene Expression Is Altered in Piglet Small Intestine by Weaning and Dietary  
690 Glutamine Supplementation. *J. Nutr.* <https://doi.org/10.1093/jn/138.6.1025>
- 691 Wang, W., Hu, H., Zijlstra, R.T., Zheng, J., Gänzle, M.G., 2019. Metagenomic  
692 reconstructions of gut microbial metabolism in weanling pigs. *Microbiome* 7.  
693 <https://doi.org/10.1186/s40168-019-0662-1>
- 694 Winter, S.E., Winter, M.G., Xavier, M.N., Thiennimitr, P., Poon, V., Keestra, A.M.,  
695 Laughlin, R.C., Gomez, G., Wu, J., Lawhon, S.D., Popova, I.E., Parikh, S.J.,  
696 Adams, L.G., Tsolis, R.M., Stewart, V.J., Bäumlner, A.J., 2013. Host-derived  
697 nitrate boosts growth of *E. coli* in the inflamed gut. *Science* (80-. ).  
698 <https://doi.org/10.1126/science.1232467>

- 699 Wu, G., Bazer, F.W., Johnson, G.A., Hou, Y., 2018. Board-invited review: Arginine  
700 nutrition and metabolism in growing, gestating, and lactating swine. *J. Anim. Sci.*  
701 <https://doi.org/10.1093/jas/sky377>
- 702 Wu, G., Knabe, D.A., Kim, S.W., 2004. Arginine Nutrition in Neonatal Pigs. *J. Nutr.*  
703 <https://doi.org/10.1093/jn/134.10.2783s>
- 704 Wu, X., Ruan, Z., Gao, Y., Yin, Y., Zhou, X., Wang, L., Geng, M., Hou, Y., Wu, G.,  
705 2010. Dietary supplementation with L-arginine or N-carbamylglutamate  
706 enhances intestinal growth and heat shock protein-70 expression in weanling  
707 pigs fed a corn-and soybean meal-based diet. *Amino Acids.*  
708 <https://doi.org/10.1007/s00726-010-0538-y>
- 709 Xu, X., Mishra, B., Qin, N., Sun, X., Zhang, S., Yang, J., Xu, R., 2019. Differential  
710 Transcriptome Analysis of Early Postnatal Developing Longissimus Dorsi  
711 Muscle from Two Pig Breeds Characterized in Divergent Myofiber Traits and  
712 Fatness. *Anim. Biotechnol.* <https://doi.org/10.1080/10495398.2018.1437045>
- 713 Xun, W., Shi, L., Zhou, H., Hou, G., Cao, T., 2018. Effect of weaning age on  
714 intestinal mucosal morphology, permeability, gene expression of tight junction  
715 proteins, cytokines and secretory IgA in Wuzhishan mini piglets. *Ital. J. Anim.*  
716 *Sci.* <https://doi.org/10.1080/1828051X.2018.1426397>
- 717 Zeng, M.Y., Inohara, N., Nuñez, G., 2017. Mechanisms of inflammation-driven  
718 bacterial dysbiosis in the gut. *Mucosal Immunol.*  
719 <https://doi.org/10.1038/mi.2016.75>
- 720 Zhang, B., Gan, L., Shahid, M.S., Lv, Z., Fan, H., Liu, D., Guo, Y., 2019. In vivo and  
721 in vitro protective effect of arginine against intestinal inflammatory response  
722 induced by *Clostridium perfringens* in broiler chickens. *J. Anim. Sci. Biotechnol.*  
723 <https://doi.org/10.1186/s40104-019-0371-4>

- 724 Zhang, Q., Widmer, G., Tzipori, S., 2013. A pig model of the human gastrointestinal  
725 tract. Gut Microbes. <https://doi.org/10.4161/gmic.23867>
- 726 Zheng, P., Song, Y., Tian, Y., Zhang, H., Yu, B., He, J., Mao, X., Yu, J., Luo, Y., Luo,  
727 J., Huang, Z., Tian, G., Chen, H., Chen, D., 2018. Dietary Arginine  
728 Supplementation Affects Intestinal Function by Enhancing Antioxidant Capacity  
729 of a Nitric Oxide-Independent Pathway in Low-Birth-Weight Piglets. J. Nutr.  
730 <https://doi.org/10.1093/jn/nxy198>
- 731
- 732
- 733
- 734

735 **Table 1:** Phenotypic measurements between weaned and unweaned pigs at 1, 4 and 14 days post weaning. Data shown are  
736 means and the pooled SEM for weaned and unweaned pigs for each time points.

| Time point (days post weaning)          | 1      |        | 4      |        | 14     |        |       | p values |         |              |
|-----------------------------------------|--------|--------|--------|--------|--------|--------|-------|----------|---------|--------------|
| Treatment                               | Unwean | wean   | unwean | wean   | unwean | Wean   | SEM   | time     | weaning | time*weaning |
| <b>Pig performance</b>                  |        |        |        |        |        |        |       |          |         |              |
| Pig weights (kg)                        | 7.16   | 6.60   | 8.31   | 7.20   | 12.68  | 12.41  | 0.37  | <0.001   | 0.002   | 0.238        |
| Body lesion scores                      | 1.3    | 2.4    | 1.7    | 2.0    | 1.6    | 1.4    | 0.2   | 0.007    | <0.001  | <0.001       |
| <b>Blood and plasma measurement</b>     |        |        |        |        |        |        |       |          |         |              |
| RBC (10 <sup>6</sup> /μl)               | 5.83   | 5.92   | 6.04   | 6.15   | 6.78   | 6.67   | 0.12  | <0.001   | 0.726   | 0.432        |
| HCT (%)                                 | 35.56  | 35.78  | 34.32  | 37.16  | 35.14  | 39.89  | 1.06  | 0.035    | <0.001  | 0.019        |
| HGB (g/dl)                              | 11.43  | 11.55  | 11.19  | 12.00  | 11.16  | 12.61  | 0.37  | 0.309    | <0.001  | 0.045        |
| PLT (10 <sup>3</sup> /μl)               | 552.6  | 551.9  | 579.4  | 491.0  | 595.5  | 436.0  | 28.8  | 0.356    | <0.001  | 0.009        |
| WBC (10 <sup>3</sup> /μl)               | 9.41   | 9.40   | 10.08  | 12.33  | 13.40  | 13.30  | 0.84  | <0.001   | 0.202   | 0.152        |
| Granulocytes (10 <sup>3</sup> /μl)      | 2.650  | 3.854  | 3.504  | 4.958  | 4.096  | 4.933  | 0.38  | 0.003    | <0.001  | 0.722        |
| Total plasma protein (g/l)              | 45.700 | 48.688 | 46.937 | 45.420 | 45.663 | 43.875 | 0.74  | 0.005    | 0.860   | 0.002        |
| Plasma globulin (g/l)                   | 16.254 | 17.418 | 16.528 | 15.757 | 14.693 | 13.262 | 0.47  | <0.001   | 0.368   | 0.018        |
| Plasma cholesterol (mmol/l)             | 3.925  | 3.687  | 3.910  | 2.441  | 3.681  | 2.432  | 0.13  | <0.001   | <0.001  | <0.001       |
| Plasma triglyceride (mmol/l)            | 0.848  | 0.872  | 0.971  | 0.470  | 0.939  | 0.511  | 0.06  | 0.001    | <0.001  | <0.001       |
| Plasma cortisol (ng/ml)                 | 15.886 | 57.744 | 16.125 | 30.884 | 10.999 | 17.767 | 4.18  | <0.001   | <0.001  | <0.001       |
| <b>Intestinal measurement</b>           |        |        |        |        |        |        |       |          |         |              |
| Villus length (μm)                      | 0.372  | 0.293  | 0.373  | 0.341  | 0.403  | 0.418  | 0.018 | <0.001   | 0.023   | 0.026        |
| Crypt depth (μm)                        | 0.151  | 0.145  | 0.155  | 0.171  | 0.175  | 0.192  | 0.005 | <0.001   | 0.018   | 0.013        |
| Villus width (μm)                       | 0.100  | 0.098  | 0.115  | 0.114  | 0.128  | 0.135  | 0.004 | <0.001   | 0.572   | 0.217        |
| V/C ratio                               | 2.508  | 2.106  | 2.500  | 2.054  | 2.368  | 2.276  | 0.137 | 0.944    | 0.005   | 0.355        |
| Mast cells (/mm <sup>2</sup> submucosa) | 100.0  | 109.8  | 96.4   | 89.6   | 182.3  | 161.2  | 13.6  | <0.001   | 0.582   | 0.517        |
| Mast cells (/mm <sup>2</sup> mucosa)    | 138.2  | 167.3  | 188.3  | 106.2  | 222.3  | 204.7  | 20.0  | <0.001   | 0.089   | 0.005        |

|                                                |        |        |        |        |        |        |       |        |        |       |
|------------------------------------------------|--------|--------|--------|--------|--------|--------|-------|--------|--------|-------|
| Goblet cells in villus (/100 $\mu\text{m}^2$ ) | 1931.1 | 2087.6 | 763.8  | 993.0  | 863.5  | 908.5  | 152.8 | <0.001 | 0.260  | 0.831 |
| Goblet cells in crypt (/100 $\mu\text{m}^2$ )  | 4204.1 | 3959.8 | 1699.4 | 1684.0 | 1815.0 | 1770.1 | 601.4 | <0.001 | 0.643  | 0.899 |
| Goblet cells total (/100 $\mu\text{m}^2$ )     | 6136.7 | 6047.4 | 2463.2 | 2677.0 | 2678.5 | 2678.5 | 451.4 | <0.001 | 0.898  | 0.925 |
| Ileal flush sIgA ( $\mu\text{g/ml}$ )          | 596.3  | 22.3   | 169.6  | 10.8   | 72.5   | 12.7   | 88.9  | 0.007  | <0.001 | 0.011 |

RBC: red blood cells, HCT: haematocrit, HGB: Haemoglobin, PLT: platelet, WBC: white blood cells, V/C: Villus/Crypt, sIgA: Secretory Immunoglobulin A

737



738 **Figure captions**

739

740 **Figure 1:** Volcano plots of differentially expressed transcripts between weaned and  
741 unweaned pigs at 1, 4 and 14 days post weaning. Red points indicates genes  
742 significant at  $Qval \leq 0.1$ .

743

744 **Figure 2:** Number of up and downregulated transcripts between weaned and  
745 unweaned pigs at 1, 4 and 14 days post weaning ( $Qval \leq 0.1$  &  $FC \geq 2$ ).

746

747 **Figure 3:** Venn diagram of the number of differentially expressed transcripts between  
748 weaned and unweaned pigs for each time point ( $Qval \leq 0.1$  &  $FC \geq 2$ ). Venn diagram  
749 was plotted using Venny, an interactive tool for comparing list.

750

751 **Figure 4:** Principal Component Analysis (PCA) of gene expression data from pigs  
752 across time point and weaning status.

753

754 **Figure 5:** Gene ontology (GO) and KEGG pathway enrichment analysis showing top  
755 10 enriched terms between weaned and unweaned pigs (all time points). Size of  
756 circles represents number of gene in each term. A: GO Biological Process, B: GO  
757 Molecular Function, C: GO Cellular Compartment, D: KEGG.

758

759

760

761 **Figure 1**

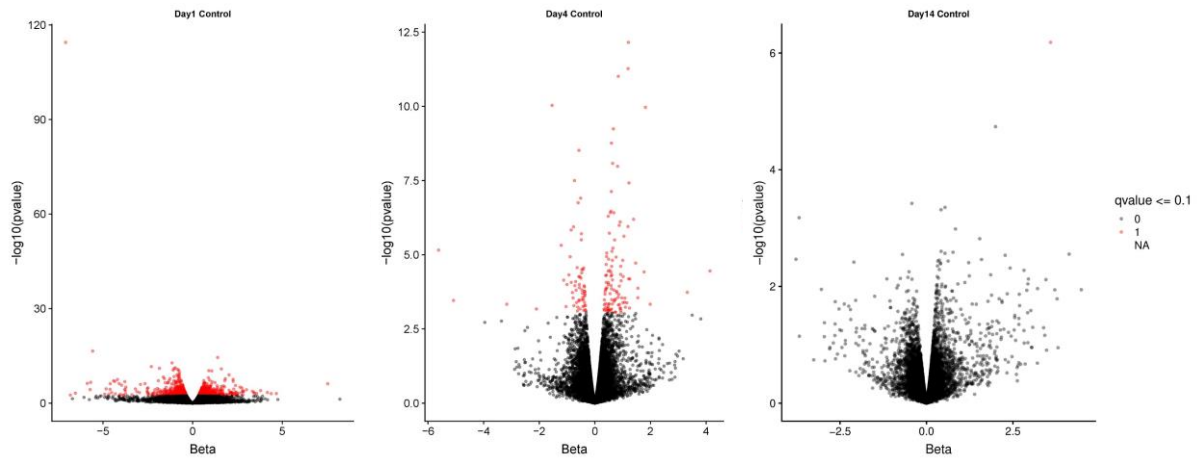

762  
763

764 **Figure 2**

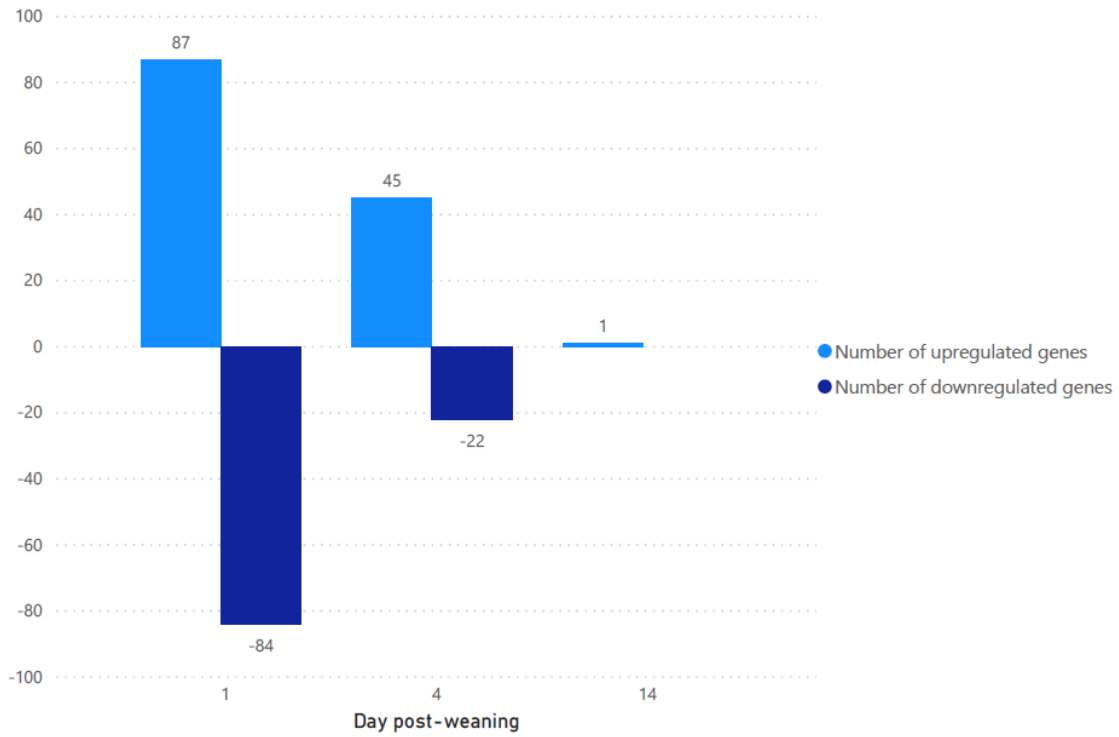

765  
766

767 **Figure 3**

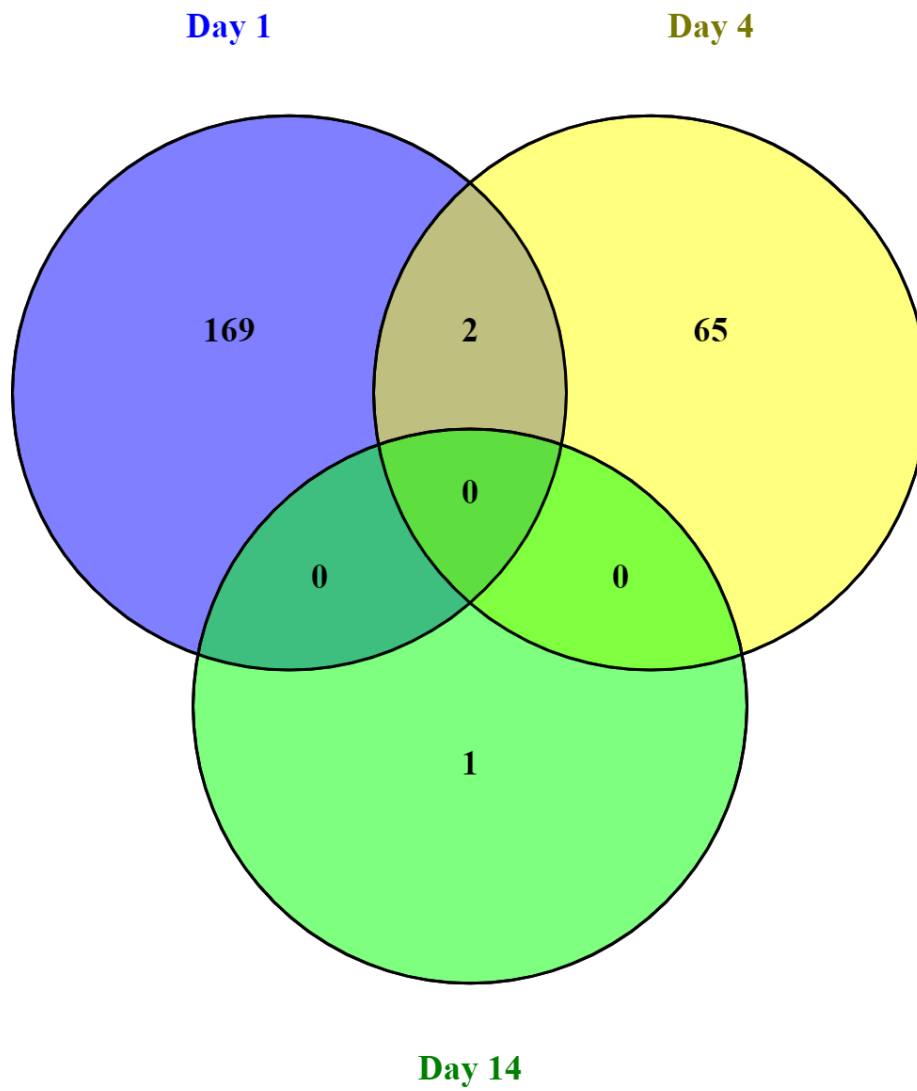

768  
769

770 **Figure 4**

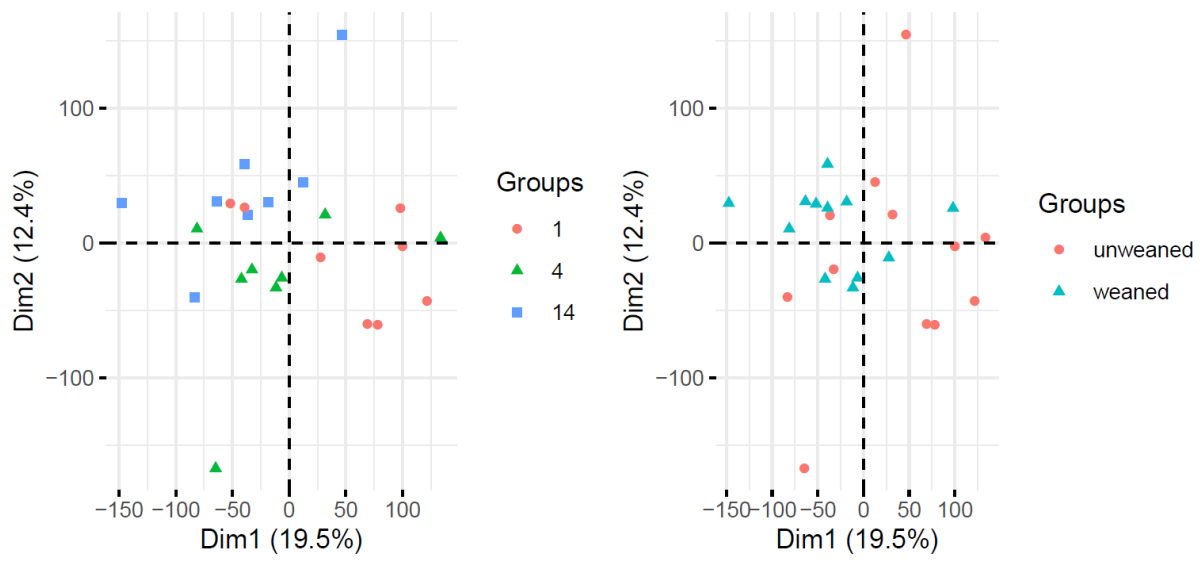

771  
772

773

774 **Figure 5**

**A**

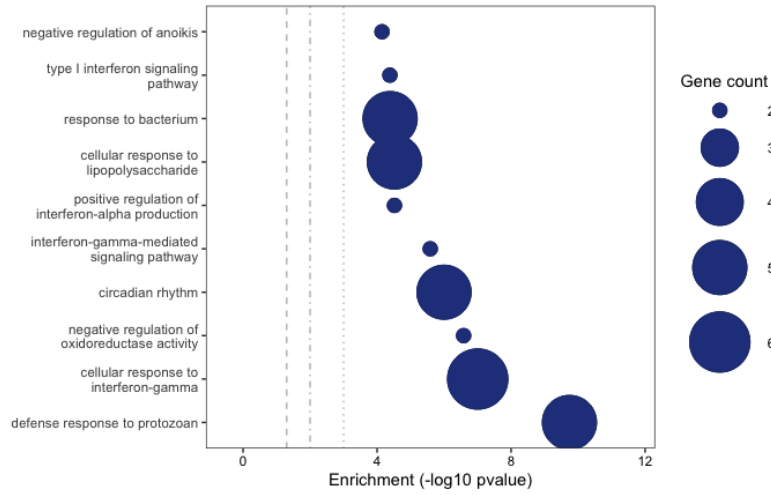

**B**

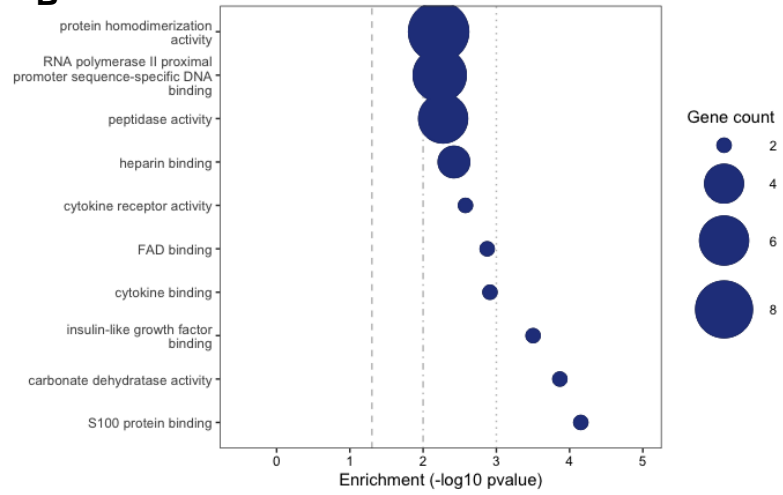

**C**

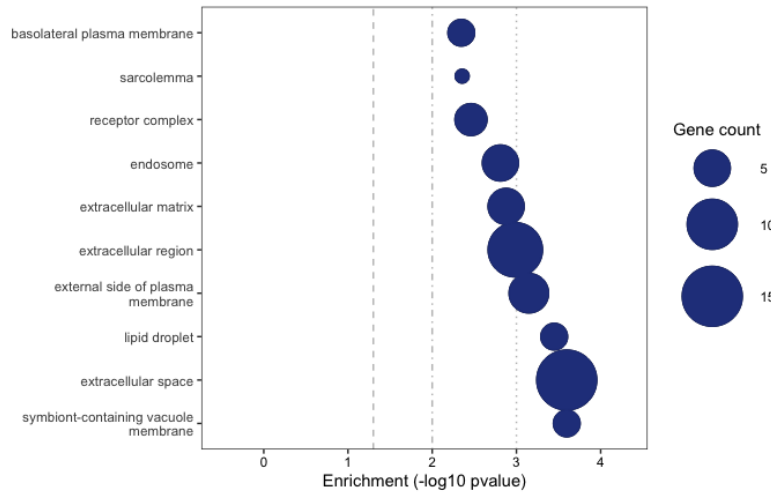

**D**

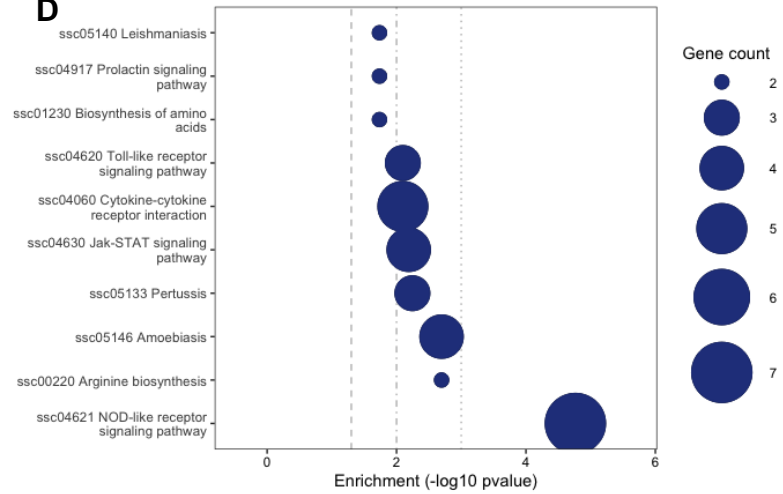

775

776
